# Supplementary material for: Metabolomics and physio-chemical analyses of mulberry plants leaves response to manganese deficiency and toxicity reveal key metabolites and their pathways in manganese tolerance
Source: Front Plant Sci. 2024 Jun 5;15:1349456. doi: 10.3389/fpls.2024.1349456 (PMC11192020; doi:10.3389/fpls.2024.1349456)
Supplement: Supplementary file 6 [file Table_5.xlsx]

## Sheet: CK-vs-T0
Table S5. Amino acids classification in groups
index	CK-1	CK-2	CK-3	T0-1	T0-2	T0-3	control_mean	case_mean	log2_FC(case_mean/control_mean)	Pvalue	fdr	vip	MS2_name	RT	m/z	Class	CAS	HMDB	C_ID	Pathway	KEGG_B_class	KEGG_A_class
M131T391_NEG	9.49409e+08	9.58408e+08	1019674894	2277601248	2240268958	2606372301	9.75831e+08	2374747502	1.28307	0.000293612	0.0149992	7.8669	DL-asparagine	391.202	131.046	Carboxylic acids and derivatives	-	HMDB0251512	-	-	-	-
M114T330_NEG	3064820185	3181521115	3363411484	2917350395	2837668461	2836111255	3203250928	2863710037	-0.161651	0.0202209	0.109151	3.6533	D-proline	330.058	114.056	Carboxylic acids and derivatives	344-25-2	HMDB0003411	C00763	ko01100//Metabolic pathways;ko00330//Arginine and proline metabolism	Amino acid metabolism;Global and overview maps	Metabolism
M218T290_2_NEG	4.91556e+08	5.10687e+08	5.22448e+08	7.04909e+08	7.17541e+08	7.2798e+08	5.0823e+08	7.1681e+08	0.496108	4.9e-05	0.00740822	3.03436	Pantothenate	289.968	218.104	Carboxylic acids and derivatives	-	HMDB0250782	C00864	ko01100//Metabolic pathways;ko01110//Biosynthesis of secondary metabolites;ko00410//beta-Alanine metabolism;ko00770//Pantothenate and CoA biosynthesis	Global and overview maps;Metabolism of cofactors and vitamins;Metabolism of other amino acids	Metabolism
M201T134_NEG	1.13712e+08	1.03361e+08	1.79891e+08	2.89618e+08	2.80842e+08	2.26065e+08	1.32321e+08	2.65508e+08	1.00471	0.0128847	0.0859819	2.29728	Ala-Leu	134.233	201.113	Carboxylic acids and derivatives	-	HMDB0251509	-	-	-	-
M188T406_NEG	1.80716e+08	2.19422e+08	2.34908e+08	1.40751e+08	1.36815e+08	136399919	2.11682e+08	1.37989e+08	-0.617347	0.0103702	0.0756348	1.7383	N-acetyl-l-glutamate	406.238	188.056	Carboxylic acids and derivatives	1188-37-0	HMDB0001138	C00624	ko01100//Metabolic pathways;ko01110//Biosynthesis of secondary metabolites;ko01230//Biosynthesis of amino acids;ko01210//2-Oxocarboxylic acid metabolism;ko00220//Arginine biosynthesis	Amino acid metabolism;Global and overview maps	Metabolism
M114T197_NEG	2.34885e+08	2.07896e+08	2.28323e+08	2.73653e+08	2.81902e+08	3.01718e+08	2.23701e+08	2.85758e+08	0.353218	0.00595251	0.0565373	1.61747	Iminodiacetic acid	197.004	114.031	Carboxylic acids and derivatives	142-73-4	HMDB0011753	-	-	-	-
M173T460_2_NEG	6.12393e+08	6.0148e+08	6.51433e+08	674186209	7.2227e+08	6.70653e+08	621768756	6.89036e+08	0.148202	0.0404486	0.160206	1.54173	Cis-aconitate	459.927	173.009	Carboxylic acids and derivatives	585-84-2	HMDB0000072	C00417	ko01100//Metabolic pathways;ko01110//Biosynthesis of secondary metabolites;ko01120//Microbial metabolism in diverse environments;ko01210//2-Oxocarboxylic acid metabolism;ko00630//Glyoxylate and dicarboxylate metabolism;ko00020//Citrate cycle (TCA cycle);ko00660//C5-Branched dibasic acid metabolism	Carbohydrate metabolism;Global and overview maps	Metabolism
M389T59_2_NEG	1.64587e+08	1.85448e+08	1.84678e+08	1.1764e+08	1.32022e+08	1.36324e+08	1.78237e+08	1.28662e+08	-0.470212	0.00501274	0.052234	1.44629	Trp-Trp	58.7163	389.164	Carboxylic acids and derivatives	-	HMDB0029094	-	-	-	-
M104T390_NEG	1.69276e+08	1.81145e+08	1.99804e+08	1.3956e+08	1.36691e+08	133506693	183408498	1.36586e+08	-0.42525	0.00664839	0.0601009	1.39798	DL-serine	390.497	104.035	Carboxylic acids and derivatives	312-84-5	HMDB0003406	C00740	ko01100//Metabolic pathways;ko00260//Glycine, serine and threonine metabolism;ko01502//Vancomycin resistance	Amino acid metabolism;Drug resistance: antimicrobial;Global and overview maps	Human Diseases;Metabolism
M155T58_NEG	1.22207e+08	1.46382e+08	1.39139e+08	1.76841e+08	1.69237e+08	1.85671e+08	1.35909e+08	1.7725e+08	0.383138	0.00858265	0.0686576	1.30949	L-theanine	57.6754	155.071	Carboxylic acids and derivatives	3081-61-6	HMDB0034365	-	-	-	-
M203T313_NEG	4.05408e+07	4.05221e+07	4.33696e+07	7.67708e+07	7.14866e+07	6.78813e+07	4.14775e+07	7.20462e+07	0.796595	0.000372271	0.0168341	1.15548	Val-Ser	312.94	203.104	Carboxylic acids and derivatives	13588-94-8	HMDB0029136	-	-	-	-
M171T182_2_NEG	3.95056e+08	4.04521e+08	4.25209e+08	4.33825e+08	4.34373e+08	4.57636e+08	4.08262e+08	4.41945e+08	0.11437	0.0469569	0.174959	1.11569	L-homocitrulline	182.343	171.102	Carboxylic acids and derivatives	1190-49-4	HMDB0000679	-	-	-	-
M133T391_2_POS	1.17425e+09	1.19333e+09	1.58043e+09	2.85988e+09	2.84393e+09	3.45039e+09	1.316e+09	3.0514e+09	1.21331	0.00192359	0.0320918	11.1805	D-asparagine	390.746	133.06	Carboxylic acids and derivatives	2058-58-4	HMDB0033780	-	-	-	-
M293T445_3_POS	2.18508e+09	2.20471e+09	2.375e+09	1.13947e+09	1.13471e+09	1.14635e+09	2.25493e+09	1.14018e+09	-0.983821	5.07018e-05	0.0126114	9.10041	Ethylenediaminetetraacetic acid	445.086	293.098	Carboxylic acids and derivatives	-	HMDB0303556	-	-	-	-
M104T388_2_POS	4.18511e+09	4.32687e+09	4.44122e+09	3.82429e+09	4.00752e+09	3.81081e+09	4.31773e+09	3.88087e+09	-0.153892	0.0109962	0.0772149	5.44969	.gamma.-aminobutyric acid	387.587	104.071	Carboxylic acids and derivatives	56-12-2	HMDB0000112	C00334	ko01100//Metabolic pathways;ko01120//Microbial metabolism in diverse environments;ko00760//Nicotinate and nicotinamide metabolism;ko00330//Arginine and proline metabolism;ko00250//Alanine, aspartate and glutamate metabolism;ko00410//beta-Alanine metabolism;ko00650//Butanoate metabolism	Amino acid metabolism;Carbohydrate metabolism;Global and overview maps;Metabolism of cofactors and vitamins;Metabolism of other amino acids	Metabolism
M147T388_POS	4.3869e+08	4.45111e+08	4.80604e+08	6.80015e+08	6.81398e+08	7.22306e+08	4.54802e+08	6.94573e+08	0.610889	0.000228621	0.0145306	4.20508	D-glutamine	388.369	147.076	Carboxylic acids and derivatives	5959-95-5	HMDB0003423	C00819	ko01100//Metabolic pathways	Global and overview maps	Metabolism
M175T374_POS	1.48696e+08	1.66741e+08	1.68092e+08	3.89629e+08	3.58853e+08	4.13701e+08	1.61176e+08	3.87394e+08	1.26516	0.000186908	0.0139339	4.07916	Arginine	374.405	175.108	Carboxylic acids and derivatives	-	HMDB0303361	-	-	-	-
M229T386_2_POS	9.4993e+08	9.23644e+08	9.31502e+08	1.15531e+09	1.10751e+09	1.24226e+09	9.35025e+08	1.16836e+09	0.321408	0.00438484	0.0480369	4.05749	L-leucyl-l-proline	385.851	229.155	Carboxylic acids and derivatives	6403-35-6	HMDB0011175	-	-	-	-
M291T428_1_POS	9.1362e+08	9.14108e+08	1.01991e+09	7.38157e+08	7.13033e+08	7.71119e+08	9.49212e+08	7.4077e+08	-0.357705	0.00598642	0.0556861	3.82396	Argininosuccinic acid	428.342	291.13	Carboxylic acids and derivatives	2387-71-5	HMDB0000052	C03406	ko01100//Metabolic pathways;ko01110//Biosynthesis of secondary metabolites;ko01230//Biosynthesis of amino acids;ko00250//Alanine, aspartate and glutamate metabolism;ko00220//Arginine biosynthesis	Amino acid metabolism;Global and overview maps	Metabolism
M276T196_POS	1.56786e+08	1.55283e+08	1.60397e+08	3.41742e+08	3.32993e+08	3.91046e+08	1.57489e+08	3.5526e+08	1.17363	0.000401342	0.0171777	3.81216	Glu-Lys	195.996	276.144	Carboxylic acids and derivatives	5891-53-2	HMDB0004207	-	-	-	-
M166T275_POS	5.83424e+08	6.13414e+08	6.91306e+08	7.70495e+08	6.94277e+08	7.77344e+08	6.29381e+08	7.47372e+08	0.247893	0.0475007	0.182747	2.65382	Phenylalanine	274.675	166.086	Carboxylic acids and derivatives	-	HMDB0250791	-	-	-	-
M276T446_POS	5.50501e+07	6.0579e+07	6.54951e+07	9.2579e+07	9.54113e+07	9.48566e+07	6.03747e+07	9.42823e+07	0.643042	0.000416564	0.0174658	1.57692	Gamma-glu-glu	446.406	276.119	Carboxylic acids and derivatives	1116-22-9	HMDB0011737	-	-	-	-
M349T449_POS	3.12585e+07	3.30969e+07	3.54894e+07	5.63377e+07	5.59427e+07	5.40876e+07	3.32816e+07	5.5456e+07	0.736618	9.48656e-05	0.0126114	1.27966	Enalaprilat	449.147	349.172	Carboxylic acids and derivatives	76420-72-9	HMDB0041886	-	-	-	-
M272T311_POS	2.45221e+07	2.75275e+07	2.84765e+07	4.24361e+07	3.98416e+07	4.25242e+07	2.68421e+07	4.16006e+07	0.63211	0.000570342	0.0193214	1.03552	Asp-Arg	311.113	272.186	Carboxylic acids and derivatives	-	HMDB0028747	C01479	ko01110//Biosynthesis of secondary metabolites;ko00960//Tropane, piperidine and pyridine alkaloid biosynthesis	Biosynthesis of other secondary metabolites;Global and overview maps	Metabolism
M568T442_POS	4.31464e+07	4.04433e+07	5.37586e+07	6.50388e+07	5.92396e+07	5.99497e+07	4.57828e+07	6.14094e+07	0.423654	0.0247257	0.123558	1.00103	Nelfinavir	442.229	568.313	Carboxylic acids and derivatives	159989-64-7	HMDB0014365	-	-	-	-

## Sheet: CK-vs-T1
Table S5. Amino acids classification in groups
index	CK-1	CK-2	CK-3	T1-1	T1-2	T1-3	control_mean	case_mean	log2_FC(case_mean/control_mean)	Pvalue	fdr	vip	MS2_name	RT	m/z	Class	CAS	HMDB	C_ID	Pathway	KEGG_B_class	KEGG_A_class
M114T330_NEG	3064820185	3181521115	3363411484	2243479309	2355830034	1633225594	3203250928	2077511646	-0.62468	0.0094723	0.120845	6.29033	D-proline	330.058	114.056	Carboxylic acids and derivatives	344-25-2	HMDB0003411	C00763	ko01100//Metabolic pathways;ko00330//Arginine and proline metabolism	Amino acid metabolism;Global and overview maps	Metabolism
M131T391_NEG	9.49409e+08	9.58408e+08	1019674894	1321900671	1382787965	1685927027	9.75831e+08	1463538554	0.584758	0.0131441	0.140458	4.07007	DL-asparagine	391.202	131.046	Carboxylic acids and derivatives	-	HMDB0251512	-	-	-	-
M218T290_2_NEG	4.91556e+08	5.10687e+08	5.22448e+08	7.05861e+08	6.69288e+08	6.57508e+08	5.0823e+08	6.77552e+08	0.414849	0.000585943	0.0509728	2.60133	Pantothenate	289.968	218.104	Carboxylic acids and derivatives	-	HMDB0250782	C00864	ko01100//Metabolic pathways;ko01110//Biosynthesis of secondary metabolites;ko00410//beta-Alanine metabolism;ko00770//Pantothenate and CoA biosynthesis	Global and overview maps;Metabolism of cofactors and vitamins;Metabolism of other amino acids	Metabolism
M117T405_1_NEG	8.83404e+08	9.29668e+08	9.89023e+08	8.02363e+08	7.42268e+08	7.78167e+08	9.34032e+08	7.74266e+08	-0.270642	0.010508	0.126149	2.49964	Succinate	405.163	117.019	Carboxylic acids and derivatives	110-15-6	HMDB0000254	C00042	ko01100//Metabolic pathways;ko01110//Biosynthesis of secondary metabolites;ko01120//Microbial metabolism in diverse environments;ko01200//Carbon metabolism;ko00760//Nicotinate and nicotinamide metabolism;ko01220//Degradation of aromatic compounds;ko00350//Tyrosine metabolism;ko00630//Glyoxylate and dicarboxylate metabolism;ko00250//Alanine, aspartate and glutamate metabolism;ko00310//Lysine degra…	Amino acid metabolism;Carbohydrate metabolism;Energy metabolism;Global and overview maps;Metabolism of cofactors and vitamins	Metabolism
M164T276_2_NEG	2.6892e+08	2.89902e+08	3.03105e+08	3.90234e+08	3.80714e+08	3.49947e+08	2.87309e+08	3.73632e+08	0.379014	0.00534881	0.0974698	1.83385	N-acetyl-l-phenylalanine	276.339	164.072	Carboxylic acids and derivatives	2018-61-3	HMDB0000512	C03519	ko01100//Metabolic pathways;ko00360//Phenylalanine metabolism	Amino acid metabolism;Global and overview maps	Metabolism
M389T59_2_NEG	1.64587e+08	1.85448e+08	1.84678e+08	1.06698e+08	1.27406e+08	6.61895e+07	1.78237e+08	1.00098e+08	-0.832391	0.0153068	0.148754	1.64162	Trp-Trp	58.7163	389.164	Carboxylic acids and derivatives	-	HMDB0029094	-	-	-	-
M200T238_NEG	3.21672e+08	3.62549e+08	367397342	2.982e+08	2.90526e+08	2.28651e+08	3.50539e+08	272458964	-0.363537	0.0414809	0.231727	1.59139	O-succinyl-l-homoserine	237.713	200.056	Carboxylic acids and derivatives	-	HMDB0255868	C01118	ko01100//Metabolic pathways;ko01110//Biosynthesis of secondary metabolites;ko01230//Biosynthesis of amino acids;ko00270//Cysteine and methionine metabolism;ko00920//Sulfur metabolism	Amino acid metabolism;Energy metabolism;Global and overview maps	Metabolism
M73T405_NEG	1.73676e+08	1.89596e+08	1.99101e+08	1.59991e+08	1.48889e+08	1.55534e+08	1.87458e+08	1.54805e+08	-0.276115	0.0156407	0.149377	1.12925	Propionic acid	405.171	73.0295	Carboxylic acids and derivatives	79-09-4	HMDB0000237	C00163	ko01100//Metabolic pathways;ko01120//Microbial metabolism in diverse environments;ko00760//Nicotinate and nicotinamide metabolism;ko01220//Degradation of aromatic compounds;ko00640//Propanoate metabolism	Carbohydrate metabolism;Global and overview maps;Metabolism of cofactors and vitamins	Metabolism
M277T331_NEG	7.00151e+07	8.58145e+07	8.19035e+07	4.66656e+07	6.3977e+07	3.2921e+07	7.92444e+07	4.78545e+07	-0.727653	0.0366276	0.220215	1.01111	Tyr-Pro	331.373	277.141	Carboxylic acids and derivatives	-	HMDB0029113	-	-	-	-
M293T445_3_POS	2.18508e+09	2.20471e+09	2.375e+09	1.24565e+09	1.36326e+09	9.55812e+08	2.25493e+09	1.18824e+09	-0.924258	0.00139785	0.0640162	9.10919	Ethylenediaminetetraacetic acid	445.086	293.098	Carboxylic acids and derivatives	-	HMDB0303556	-	-	-	-
M534T275_2_POS	2.74676e+09	2.51021e+09	2.4102e+09	1.65446e+09	1.26161e+09	2.0256e+09	2.55573e+09	1.64722e+09	-0.633696	0.0199016	0.162278	8.00148	Atazanavir	275.43	534.327	Carboxylic acids and derivatives	198904-31-3	HMDB0015205	-	-	-	-
M133T391_2_POS	1.17425e+09	1.19333e+09	1.58043e+09	1.678e+09	1.69906e+09	2.03505e+09	1.316e+09	1.80404e+09	0.455066	0.0499812	0.250142	5.4025	D-asparagine	390.746	133.06	Carboxylic acids and derivatives	2058-58-4	HMDB0033780	-	-	-	-
M147T388_POS	4.3869e+08	4.45111e+08	4.80604e+08	6.56533e+08	6.59527e+08	7.82913e+08	4.54802e+08	6.99658e+08	0.621412	0.00495279	0.0956055	4.23401	D-glutamine	388.369	147.076	Carboxylic acids and derivatives	5959-95-5	HMDB0003423	C00819	ko01100//Metabolic pathways	Global and overview maps	Metabolism
M192T88_POS	6.73874e+08	7.58382e+08	7.48244e+08	6.49811e+08	4.61799e+08	4.71517e+08	7.26833e+08	5.27709e+08	-0.461882	0.0404682	0.227956	3.65816	N-acetyl-l-methionine	88.0807	192.087	Carboxylic acids and derivatives	65-82-7	HMDB0011745	-	-	-	-
M166T275_POS	5.83424e+08	6.13414e+08	6.91306e+08	8.82245e+08	8.12241e+08	7.55869e+08	6.29381e+08	8.16785e+08	0.376022	0.0183063	0.155626	3.6227	Phenylalanine	274.675	166.086	Carboxylic acids and derivatives	-	HMDB0250791	-	-	-	-
M229T386_2_POS	9.4993e+08	9.23644e+08	9.31502e+08	1.08133e+09	1.03275e+09	1.05195e+09	9.35025e+08	1.05534e+09	0.174635	0.00172668	0.0642969	3.08241	L-leucyl-l-proline	385.851	229.155	Carboxylic acids and derivatives	6403-35-6	HMDB0011175	-	-	-	-
M175T374_POS	1.48696e+08	1.66741e+08	1.68092e+08	2.73297e+08	2.43868e+08	2.65535e+08	1.61176e+08	2.609e+08	0.694855	0.000764548	0.0563845	2.77494	Arginine	374.405	175.108	Carboxylic acids and derivatives	-	HMDB0303361	-	-	-	-
M319T299_POS	1.75998e+08	2.07752e+08	2.0995e+08	1.20084e+08	1.2954e+08	8.10383e+07	1.979e+08	1.10221e+08	-0.844378	0.0089688	0.115534	2.56181	His-Tyr	299.238	319.1	Carboxylic acids and derivatives	35979-00-1	HMDB0028897	-	-	-	-
M276T446_POS	5.50501e+07	6.0579e+07	6.54951e+07	1.23507e+08	1.33744e+08	8.78741e+07	6.03747e+07	1.15042e+08	0.930141	0.0184126	0.156034	1.98838	Gamma-glu-glu	446.406	276.119	Carboxylic acids and derivatives	1116-22-9	HMDB0011737	-	-	-	-
M307T316_POS	1.0914e+08	1.06154e+08	1.17436e+08	9.42875e+07	7.88595e+07	7.42209e+07	1.1091e+08	8.24559e+07	-0.427693	0.0148618	0.143731	1.43007	Glutathione, oxidized	316.345	307.079	Carboxylic acids and derivatives	15718-51-1	HMDB0011691	C00127	ko01100//Metabolic pathways;ko00480//Glutathione metabolism	Global and overview maps;Metabolism of other amino acids	Metabolism
M288T370_POS	9.53035e+07	9.52627e+07	9.9432e+07	1.17064e+08	1.12758e+08	1.15274e+08	9.66661e+07	1.15032e+08	0.250956	0.000594541	0.0541145	1.19403	Arg-Leu	369.937	288.203	Carboxylic acids and derivatives	1188-24-5	HMDB0028713	-	-	-	-
M568T442_POS	4.31464e+07	4.04433e+07	5.37586e+07	6.41134e+07	5.80417e+07	6.18922e+07	4.57828e+07	6.13491e+07	0.422237	0.024653	0.179878	1.02086	Nelfinavir	442.229	568.313	Carboxylic acids and derivatives	159989-64-7	HMDB0014365	-	-	-	-

## Sheet: CK-vs-T2
Table S5. Amino acids classification in groups
index	CK-1	CK-2	CK-3	T2-1	T2-2	T2-3	control_mean	case_mean	log2_FC(case_mean/control_mean)	Pvalue	fdr	vip	MS2_name	RT	m/z	Class	CAS	HMDB	C_ID	Pathway	KEGG_B_class	KEGG_A_class
M144T371_2_NEG	2.98841e+09	3.29552e+09	3.54667e+09	4.15492e+09	3.86449e+09	4.07967e+09	3.27686e+09	4.03302e+09	0.299547	0.0145734	0.0967339	5.09749	G-guanidinobutyrate	371.246	144.067	Carboxylic acids and derivatives	463-00-3	HMDB0003464	C01035	ko01100//Metabolic pathways;ko00330//Arginine and proline metabolism	Amino acid metabolism;Global and overview maps	Metabolism
M114T330_NEG	3.06482e+09	3.18152e+09	3.36341e+09	2.48257e+09	2.75393e+09	2.96238e+09	3.20325e+09	2.73296e+09	-0.229072	0.0454463	0.174978	4.00223	D-proline	330.058	114.056	Carboxylic acids and derivatives	344-25-2	HMDB0003411	C00763	ko01100//Metabolic pathways;ko00330//Arginine and proline metabolism	Amino acid metabolism;Global and overview maps	Metabolism
M132T424_NEG	6.46676e+08	5.79477e+08	7.03798e+08	2.46818e+08	2.56007e+08	2.88726e+08	6.43317e+08	2.6385e+08	-1.28581	0.000571552	0.0289514	3.83287	D-aspartic acid	423.756	132.03	Carboxylic acids and derivatives	1783-96-6	HMDB0006483	C00402	ko01100//Metabolic pathways;ko00250//Alanine, aspartate and glutamate metabolism	Amino acid metabolism;Global and overview maps	Metabolism
M218T290_2_NEG	4.91556e+08	5.10687e+08	5.22448e+08	7.18659e+08	6.82318e+08	7.96039e+08	5.0823e+08	7.32339e+08	0.527029	0.00296611	0.052365	2.88556	Pantothenate	289.968	218.104	Carboxylic acids and derivatives	-	HMDB0250782	C00864	ko01100//Metabolic pathways;ko01110//Biosynthesis of secondary metabolites;ko00410//beta-Alanine metabolism;ko00770//Pantothenate and CoA biosynthesis	Global and overview maps;Metabolism of cofactors and vitamins;Metabolism of other amino acids	Metabolism
M171T182_2_NEG	3.95056e+08	4.04521e+08	4.25209e+08	6.19786e+08	5.08938e+08	5.2364e+08	4.08262e+08	5.50788e+08	0.432002	0.0165087	0.101843	2.25675	L-homocitrulline	182.343	171.102	Carboxylic acids and derivatives	1190-49-4	HMDB0000679	-	-	-	-
M155T58_NEG	1.22207e+08	1.46382e+08	1.39139e+08	2.61563e+08	2.08093e+08	2.50059e+08	1.35909e+08	2.39905e+08	0.81982	0.00424224	0.0605301	1.9762	L-theanine	57.6754	155.071	Carboxylic acids and derivatives	3081-61-6	HMDB0034365	-	-	-	-
M164T276_2_NEG	2.6892e+08	2.89902e+08	3.03105e+08	1.99551e+08	1.93663e+08	2.10261e+08	2.87309e+08	2.01158e+08	-0.514272	0.00147301	0.0417064	1.81699	N-acetyl-l-phenylalanine	276.339	164.072	Carboxylic acids and derivatives	2018-61-3	HMDB0000512	C03519	ko01100//Metabolic pathways;ko00360//Phenylalanine metabolism	Amino acid metabolism;Global and overview maps	Metabolism
M104T390_NEG	1.69276e+08	1.81145e+08	1.99804e+08	1.23207e+08	1.17929e+08	1.21971e+08	1.83408e+08	1.21036e+08	-0.599628	0.00230118	0.047721	1.54392	DL-serine	390.497	104.035	Carboxylic acids and derivatives	312-84-5	HMDB0003406	C00740	ko01100//Metabolic pathways;ko00260//Glycine, serine and threonine metabolism;ko01502//Vancomycin resistance	Amino acid metabolism;Drug resistance: antimicrobial;Global and overview maps	Human Diseases;Metabolism
M88T362_NEG	2.81989e+08	3.03597e+08	3.28721e+08	2.50562e+08	2.21949e+08	2.48655e+08	3.04769e+08	2.40389e+08	-0.342347	0.0170265	0.103548	1.50699	Sarcosine	361.952	88.0403	Carboxylic acids and derivatives	107-97-1	HMDB0000271	C00213	ko01100//Metabolic pathways;ko00260//Glycine, serine and threonine metabolism;ko00330//Arginine and proline metabolism	Amino acid metabolism;Global and overview maps	Metabolism
M637T30_NEG	1.97078e+08	1.93855e+08	1.89085e+08	2.53043e+08	2.32171e+08	2.1445e+08	1.9334e+08	2.33221e+08	0.270563	0.024878	0.12623	1.18375	Norfloxacin	29.9951	637.266	Carboxylic acids and derivatives	70458-96-7	HMDB0015192	C06687	ko02010//ABC transporters	Membrane transport	Environmental Information Processing
M175T527_1_POS	1.04883e+10	9.82464e+09	1.08656e+10	7.00982e+09	7.67154e+09	8.82323e+09	1.03929e+10	7.83486e+09	-0.407613	0.0138427	0.0921382	13.369	DL-arginine	527.059	175.119	Carboxylic acids and derivatives	-	HMDB0251511	-	-	-	-
M293T445_3_POS	2.18508e+09	2.20471e+09	2.375e+09	1.37481e+09	1.25753e+09	1.40699e+09	2.25493e+09	1.34644e+09	-0.743929	0.000273348	0.0190909	8.31841	Ethylenediaminetetraacetic acid	445.086	293.098	Carboxylic acids and derivatives	-	HMDB0303556	-	-	-	-
M133T391_2_POS	1.17425e+09	1.19333e+09	1.58043e+09	1.57839e+09	2.05594e+09	2.09124e+09	1.316e+09	1.90852e+09	0.536294	0.0489377	0.185106	6.06378	D-asparagine	390.746	133.06	Carboxylic acids and derivatives	2058-58-4	HMDB0033780	-	-	-	-
M229T386_2_POS	9.4993e+08	9.23644e+08	9.31502e+08	1.28828e+09	1.27564e+09	1.37534e+09	9.35025e+08	1.31309e+09	0.489885	0.000304527	0.0191376	5.37499	L-leucyl-l-proline	385.851	229.155	Carboxylic acids and derivatives	6403-35-6	HMDB0011175	-	-	-	-
M276T196_POS	1.56786e+08	1.55283e+08	1.60397e+08	5.46046e+08	3.64461e+08	4.11962e+08	1.57489e+08	4.40823e+08	1.48495	0.00647477	0.0646819	4.54782	Glu-Lys	195.996	276.144	Carboxylic acids and derivatives	5891-53-2	HMDB0004207	-	-	-	-
M147T388_POS	4.3869e+08	4.45111e+08	4.80604e+08	6.02644e+08	7.10239e+08	6.71242e+08	4.54802e+08	6.61375e+08	0.54023	0.00372538	0.0503161	3.87756	D-glutamine	388.369	147.076	Carboxylic acids and derivatives	5959-95-5	HMDB0003423	C00819	ko01100//Metabolic pathways	Global and overview maps	Metabolism
M291T428_1_POS	9.1362e+08	9.14108e+08	1.01991e+09	7.06253e+08	7.27435e+08	7.90754e+08	9.49212e+08	7.41481e+08	-0.356322	0.00881824	0.0763027	3.85311	Argininosuccinic acid	428.342	291.13	Carboxylic acids and derivatives	2387-71-5	HMDB0000052	C03406	ko01100//Metabolic pathways;ko01110//Biosynthesis of secondary metabolites;ko01230//Biosynthesis of amino acids;ko00250//Alanine, aspartate and glutamate metabolism;ko00220//Arginine biosynthesis	Amino acid metabolism;Global and overview maps	Metabolism
M287T185_POS	4.54389e+08	4.84695e+08	4.40594e+08	2.70201e+08	2.76695e+08	2.94714e+08	4.59892e+08	2.80536e+08	-0.713108	0.000276474	0.0190909	3.7021	His-Met	184.512	287.055	Carboxylic acids and derivatives	215070	HMDB0028891	C05903	ko01100//Metabolic pathways;ko01110//Biosynthesis of secondary metabolites;ko00941//Flavonoid biosynthesis;ko00944//Flavone and flavonol biosynthesis	Biosynthesis of other secondary metabolites;Global and overview maps	Metabolism
M175T374_POS	1.48696e+08	1.66741e+08	1.68092e+08	2.69117e+08	2.90987e+08	3.28914e+08	1.61176e+08	2.96339e+08	0.878609	0.00188686	0.0363251	3.171	Arginine	374.405	175.108	Carboxylic acids and derivatives	-	HMDB0303361	-	-	-	-
M118T316_POS	3.12978e+08	3.41286e+08	4.08537e+08	2.13064e+08	2.16027e+08	2.38386e+08	3.54267e+08	2.22492e+08	-0.671082	0.0110287	0.0836956	3.05516	DL-valine	316.447	118.086	Carboxylic acids and derivatives	-	HMDB0250806	-	-	-	-
M228T353_2_POS	5.12316e+08	5.14078e+08	4.82943e+08	6.08144e+08	5.91157e+08	6.10861e+08	5.03112e+08	6.03387e+08	0.262204	0.00106207	0.0285614	2.75303	N-octanoyl-l-homoserine lactone	352.554	228.159	Carboxylic acids and derivatives	-	HMDB0255213	-	-	-	-
M276T446_POS	5.50501e+07	6.0579e+07	6.54951e+07	1.21243e+08	8.92233e+07	9.24269e+07	6.03747e+07	1.00964e+08	0.741829	0.0187396	0.108267	1.67734	Gamma-glu-glu	446.406	276.119	Carboxylic acids and derivatives	1116-22-9	HMDB0011737	-	-	-	-
M160T66_POS	8.4269e+07	1.02452e+08	1.00117e+08	1.28376e+08	1.26638e+08	1.33223e+08	9.56128e+07	1.29413e+08	0.436702	0.00501108	0.0575275	1.56647	N-acetyl-dl-valine	65.6693	160.097	Carboxylic acids and derivatives	96-81-1	HMDB0011757	-	-	-	-
M189T365_POS	6.93076e+07	7.14029e+07	8.05489e+07	4.10375e+07	4.41265e+07	4.42311e+07	7.37531e+07	4.31317e+07	-0.773956	0.00105534	0.0285614	1.52067	N.epsilon.-acetyl-l-lysine	365.264	189.123	Carboxylic acids and derivatives	692-04-6	HMDB0000206	C02727	ko01100//Metabolic pathways;ko00310//Lysine degradation	Amino acid metabolism;Global and overview maps	Metabolism
M160T364_POS	8.46794e+07	7.83797e+07	9.60225e+07	1.21868e+08	1.106e+08	1.20571e+08	8.63605e+07	1.17679e+08	0.446415	0.00751801	0.0694836	1.50544	Betonicine	364.474	160.097	Carboxylic acids and derivatives	515-25-3	HMDB0029412	-	-	-	-
M310T363_POS	2.44588e+07	2.40155e+07	2.8535e+07	5.677e+07	5.00839e+07	4.72696e+07	2.56698e+07	5.13745e+07	1.00098	0.00124755	0.0304602	1.39207	Tyr-Lys	363.185	310.165	Carboxylic acids and derivatives	-	HMDB0029110	-	-	-	-
M277T465_POS	6.10729e+07	6.57764e+07	7.27638e+07	3.91445e+07	3.67057e+07	4.57431e+07	6.65377e+07	4.05311e+07	-0.715143	0.00389553	0.0509334	1.38123	L-saccharopine	465.141	277.14	Carboxylic acids and derivatives	997-68-2	HMDB0000279	C00449	ko01100//Metabolic pathways;ko01110//Biosynthesis of secondary metabolites;ko01230//Biosynthesis of amino acids;ko00310//Lysine degradation;ko00300//Lysine biosynthesis	Amino acid metabolism;Global and overview maps	Metabolism
M170T395_POS	3.14941e+07	4.02613e+07	2.62718e+07	5.62169e+07	5.53495e+07	5.51677e+07	3.26757e+07	5.5578e+07	0.766295	0.0050123	0.0575275	1.2905	3-methyl-l-histidine	395.348	170.093	Carboxylic acids and derivatives	368-16-1	HMDB0000479	C01152	ko01100//Metabolic pathways;ko00340//Histidine metabolism	Amino acid metabolism;Global and overview maps	Metabolism
M231T222_POS	1.47774e+08	1.49855e+08	1.5119e+08	1.30621e+08	1.18685e+08	1.30424e+08	1.49606e+08	1.26577e+08	-0.241156	0.00480518	0.0566133	1.29032	Leu-Val	222.333	231.17	Carboxylic acids and derivatives	-	HMDB0028942	-	-	-	-
M614T275_POS	3.29971e+07	3.22957e+07	2.87412e+07	1.41038e+07	1.46032e+07	1.57194e+07	3.13447e+07	1.48088e+07	-1.08176	0.00029514	0.0191376	1.12276	Indinavir	274.781	614.354	Carboxylic acids and derivatives	150378-17-9	HMDB0014369	-	-	-	-
M172T80_POS	2.7921e+07	2.8083e+07	3.53026e+07	4.44923e+07	4.51817e+07	5.47897e+07	3.04355e+07	4.81545e+07	0.661916	0.0126328	0.0885261	1.11512	Gabapentin	80.1447	172.133	Carboxylic acids and derivatives	60142-96-3	HMDB0005015	-	-	-	-
M150T403_POS	1.70191e+07	1.74622e+07	1.70159e+07	3.47703e+07	2.96382e+07	3.26159e+07	1.71657e+07	3.23414e+07	0.913854	0.000530581	0.022442	1.07638	L-methionine	403.17	150.076	Carboxylic acids and derivatives	59-51-8	HMDB0033951	C00073	ko01100//Metabolic pathways;ko01110//Biosynthesis of secondary metabolites;ko01230//Biosynthesis of amino acids;ko01210//2-Oxocarboxylic acid metabolism;ko00270//Cysteine and methionine metabolism;ko00970//Aminoacyl-tRNA biosynthesis;ko00966//Glucosinolate biosynthesis	Amino acid metabolism;Biosynthesis of other secondary metabolites;Global and overview maps;Translation	Genetic Information Processing;Metabolism
M665T285_POS	1.72733e+07	1.43135e+07	1.5997e+07	3.28867e+07	3.31924e+07	2.51428e+07	1.58613e+07	3.04073e+07	0.938911	0.00628904	0.0639875	1.02525	Zanamivir	284.59	665.263	Carboxylic acids and derivatives	139110-80-8	HMDB0014698	-	-	-	-

## Sheet: CK-vs-T3
Table S5. Amino acids classification in groups
index	CK-1	CK-2	CK-3	T3-1	T3-2	T3-3	control_mean	case_mean	log2_FC(case_mean/control_mean)	Pvalue	fdr	vip	MS2_name	RT	m/z	Class	CAS	HMDB	C_ID	Pathway	KEGG_B_class	KEGG_A_class
M114T330_NEG	3064820185	3181521115	3363411484	1449592348	2372972003	2411924531	3203250928	2078162961	-0.624228	0.0260931	0.184264	6.39212	D-proline	330.058	114.056	Carboxylic acids and derivatives	344-25-2	HMDB0003411	C00763	ko01100//Metabolic pathways;ko00330//Arginine and proline metabolism	Amino acid metabolism;Global and overview maps	Metabolism
M188T406_NEG	1.80716e+08	2.19422e+08	2.34908e+08	6.85379e+07	1.26215e+08	1.35583e+08	2.11682e+08	1.10112e+08	-0.942928	0.0184374	0.162638	1.99222	N-acetyl-l-glutamate	406.238	188.056	Carboxylic acids and derivatives	1188-37-0	HMDB0001138	C00624	ko01100//Metabolic pathways;ko01110//Biosynthesis of secondary metabolites;ko01230//Biosynthesis of amino acids;ko01210//2-Oxocarboxylic acid metabolism;ko00220//Arginine biosynthesis	Amino acid metabolism;Global and overview maps	Metabolism
M277T331_NEG	7.00151e+07	8.58145e+07	8.19035e+07	2.5299e+07	5.55451e+07	5.69003e+07	7.92444e+07	4.59148e+07	-0.787348	0.0426102	0.227248	1.0872	Tyr-Pro	331.373	277.141	Carboxylic acids and derivatives	-	HMDB0029113	-	-	-	-
M115T313_NEG	7.39669e+07	7.06028e+07	7.3721e+07	8.96707e+07	9.70569e+07	1.02502e+08	7.27636e+07	9.64099e+07	0.405964	0.00364076	0.0936546	1.01826	L-aspartic acid	312.961	115.004	Carboxylic acids and derivatives	56-84-8	HMDB0000191	C00049	ko01100//Metabolic pathways;ko01110//Biosynthesis of secondary metabolites;ko01120//Microbial metabolism in diverse environments;ko02010//ABC transporters;ko01230//Biosynthesis of amino acids;ko01200//Carbon metabolism;ko00760//Nicotinate and nicotinamide metabolism;ko00260//Glycine, serine and threonine metabolism;ko01210//2-Oxocarboxylic acid metabolism;ko00340//Histidine metabolism;ko00250//Al…	Amino acid metabolism;Biosynthesis of other secondary metabolites;Energy metabolism;Global and overview maps;Membrane transport;Metabolism of cofactors and vitamins;Metabolism of other amino acids;Translation	Environmental Information Processing;Genetic Information Processing;Metabolism
M104T388_2_POS	4185105915	4326868763	4441215494	3568291995	3738225115	3920585698	4317730057	3742367602	-0.206322	0.0102417	0.142693	6.5445	gamma.-aminobutyric acid	387.587	104.071	Carboxylic acids and derivatives	56-12-2	HMDB0000112	C00334	ko01100//Metabolic pathways;ko01120//Microbial metabolism in diverse environments;ko00760//Nicotinate and nicotinamide metabolism;ko00330//Arginine and proline metabolism;ko00250//Alanine, aspartate and glutamate metabolism;ko00410//beta-Alanine metabolism;ko00650//Butanoate metabolism	Amino acid metabolism;Carbohydrate metabolism;Global and overview maps;Metabolism of cofactors and vitamins;Metabolism of other amino acids	Metabolism
M291T428_1_POS	9.1362e+08	9.14108e+08	1019908952	3.53261e+08	5.54064e+08	599641505	9.49212e+08	5.02322e+08	-0.918118	0.00588571	0.118103	5.69634	Argininosuccinic acid	428.342	291.13	Carboxylic acids and derivatives	2387-71-5	HMDB0000052	C03406	ko01100//Metabolic pathways;ko01110//Biosynthesis of secondary metabolites;ko01230//Biosynthesis of amino acids;ko00250//Alanine, aspartate and glutamate metabolism;ko00220//Arginine biosynthesis	Amino acid metabolism;Global and overview maps	Metabolism
M192T88_POS	6.73874e+08	7.58382e+08	7.48244e+08	2.688e+08	4.11923e+08	4.04736e+08	7.26833e+08	3.6182e+08	-1.00635	0.00243658	0.0919358	5.26108	N-acetyl-l-methionine	88.0807	192.087	Carboxylic acids and derivatives	65-82-7	HMDB0011745	-	-	-	-
M124T353_POS	7.78932e+08	894559640	9.23452e+08	4.62031e+08	5.93803e+08	6.21111e+08	8.65648e+08	5.58982e+08	-0.630979	0.00970813	0.139354	4.78173	Nicotinate	353.24	124.039	Carboxylic acids and derivatives	583-08-4	HMDB0003269	C00253	ko01100//Metabolic pathways;ko01110//Biosynthesis of secondary metabolites;ko01120//Microbial metabolism in diverse environments;ko00760//Nicotinate and nicotinamide metabolism;ko00960//Tropane, piperidine and pyridine alkaloid biosynthesis	Biosynthesis of other secondary metabolites;Global and overview maps;Metabolism of cofactors and vitamins	Metabolism
M304T407_1_POS	4.10987e+08	5.13539e+08	6.04465e+08	1.18394e+08	3.06718e+08	3.34393e+08	5.09664e+08	2.53168e+08	-1.00945	0.0433418	0.245542	4.14462	Agomelatine	407.141	304.15	Carboxylic acids and derivatives	138112-76-2	HMDB0015636	-	-	-	-
M287T185_POS	4.54389e+08	484695026	4.40594e+08	2.70369e+08	3.70024e+08	3.46626e+08	4.59892e+08	3.29006e+08	-0.483182	0.0162346	0.168571	2.98982	His-Met	184.512	287.055	Carboxylic acids and derivatives	215070	HMDB0028891	C05903	ko01100//Metabolic pathways;ko01110//Biosynthesis of secondary metabolites;ko00941//Flavonoid biosynthesis;ko00944//Flavone and flavonol biosynthesis	Biosynthesis of other secondary metabolites;Global and overview maps	Metabolism
M233T271_POS	2.66759e+08	281811938	3.12133e+08	171844561	2.15545e+08	1.75413e+08	2.86901e+08	1.87601e+08	-0.612888	0.00682679	0.12311	2.68303	Thr-Leu	270.957	233.15	Carboxylic acids and derivatives	-	HMDB0259044	-	-	-	-
M276T196_POS	1.56786e+08	1.55283e+08	1.60397e+08	2.18533e+08	3.0067e+08	2.24391e+08	1.57489e+08	2.47864e+08	0.654303	0.0270178	0.206429	2.55713	Glu-Lys	195.996	276.144	Carboxylic acids and derivatives	5891-53-2	HMDB0004207	-	-	-	-
M175T374_POS	1.48696e+08	1.66741e+08	1.68092e+08	1.14934e+08	1.29469e+08	1.26609e+08	1.61176e+08	123670657	-0.382137	0.00810907	0.131177	1.68484	Arginine	374.405	175.108	Carboxylic acids and derivatives	-	HMDB0303361	-	-	-	-
M219T425_POS	8.29659e+07	9.64661e+07	1.0548e+08	4.10663e+07	6.0718e+07	6.98667e+07	9.49706e+07	5.7217e+07	-0.731036	0.0244332	0.19729	1.63627	5-L-Glutamyl-L-alanine	425.144	219.097	Carboxylic acids and derivatives	5875-41-2	HMDB0006248	C03740	ko01100//Metabolic pathways;ko00480//Glutathione metabolism	Global and overview maps;Metabolism of other amino acids	Metabolism
M231T222_POS	1.47774e+08	149854786	1.5119e+08	1.29162e+08	1.16701e+08	1.13853e+08	149605994	1.19906e+08	-0.319269	0.00348009	0.101557	1.50434	Leu-Val	222.333	231.17	Carboxylic acids and derivatives	-	HMDB0028942	-	-	-	-
M245T433_2_POS	1.02927e+08	1.07326e+08	116497610	7.0715e+07	8.75814e+07	9.34591e+07	1.08917e+08	8.39185e+07	-0.376168	0.0340668	0.223456	1.29532	Pro-Glu	432.549	245.113	Carboxylic acids and derivatives	-	HMDB0029016	-	-	-	-
M307T316_POS	1.0914e+08	1.06154e+08	1.17436e+08	8.79953e+07	9.38952e+07	9.36699e+07	1.1091e+08	9.18534e+07	-0.271983	0.00803643	0.130737	1.16555	Glutathione, oxidized	316.345	307.079	Carboxylic acids and derivatives	15718-51-1	HMDB0011691	C00127	ko01100//Metabolic pathways;ko00480//Glutathione metabolism	Global and overview maps;Metabolism of other amino acids	Metabolism
M276T446_POS	5.50501e+07	6.0579e+07	6.54951e+07	3.68374e+07	4.46939e+07	4.78261e+07	6.03747e+07	4.31191e+07	-0.485616	0.0178502	0.175704	1.11686	Gamma-glu-glu	446.406	276.119	Carboxylic acids and derivatives	1116-22-9	HMDB0011737	-	-	-	-
M304T498_POS	3.87094e+07	3.75645e+07	4.46434e+07	1.90095e+07	2.57285e+07	2.52151e+07	4.03058e+07	2.33177e+07	-0.78956	0.00526264	0.114036	1.10961	Arg-Glu	497.516	304.162	Carboxylic acids and derivatives	15706-89-5	HMDB0028708	-	-	-	-
M665T285_POS	1.72733e+07	1.43135e+07	1.5997e+07	2.55877e+07	3.48824e+07	3.11235e+07	1.58613e+07	3.05312e+07	0.944777	0.00660823	0.121224	1.06516	Zanamivir	284.59	665.263	Carboxylic acids and derivatives	139110-80-8	HMDB0014698	-	-	-	-
M198T408_POS	4.30734e+07	5.00975e+07	5.41996e+07	2.46016e+07	3.50017e+07	4.03409e+07	4.91235e+07	3.33147e+07	-0.560254	0.0488796	0.254533	1.02942	3,4-dihydroxy-l-phenylalanine	408.196	198.053	Carboxylic acids and derivatives	59-92-7	HMDB0000181	C00355	ko01100//Metabolic pathways;ko01110//Biosynthesis of secondary metabolites;ko00350//Tyrosine metabolism;ko00950//Isoquinoline alkaloid biosynthesis;ko00965//Betalain biosynthesis	Amino acid metabolism;Biosynthesis of other secondary metabolites;Global and overview maps	Metabolism
M170T395_POS	3.14941e+07	4.02613e+07	2.62718e+07	1.19829e+07	1.63471e+07	2.30912e+07	3.26757e+07	1.71404e+07	-0.930818	0.0405644	0.240231	1.02793	3-methyl-l-histidine	395.348	170.093	Carboxylic acids and derivatives	368-16-1	HMDB0000479	C01152	ko01100//Metabolic pathways;ko00340//Histidine metabolism	Amino acid metabolism;Global and overview maps	Metabolism
